# Supplementary material
Source: MDPI journal article supplement (https://www.mdpi.com/2076-3417/13/9/5702)
Supplement: s1 [file s1]

# **Modification of Magnetic Graphene Oxide by An Earth-Friendly Deep Eutectic Solvent to Preconcentrate Ultratrac Amounts of Pb(II) and Cd(II) in Legume Samples**

Melika Hejazikhah and Parastoo Jamshidi \*

School of Chemistry, College of Science, University of Tehran, Tehran P.O. Box 14155-6455, Iran

\* Correspondence: [parastoo.jamshidi@ut.ac.ir](mailto:parastoo.jamshidi@ut.ac.ir)

## Characterization

Table S1. summarizes the data.

Table S1. FT-IR analysis.

| mGO                        |                       | EgLiCl-mGO                 |                       |
|----------------------------|-----------------------|----------------------------|-----------------------|
| Bond                       | Peak                  | Bond                       | Peak                  |
| Stretching O-H             | 3380 $\text{cm}^{-1}$ | Stretching O-H             | 3430 $\text{cm}^{-1}$ |
| Carbonyl C=O               | 1730 $\text{cm}^{-1}$ | Bending O-H                | 1640 $\text{cm}^{-1}$ |
| Aromatic C=C               | 1630 $\text{cm}^{-1}$ | CH <sub>2</sub> stretching | 2914 $\text{cm}^{-1}$ |
| Bending O-H                | 1360 $\text{cm}^{-1}$ | CH <sub>2</sub> scissor    | 1460 $\text{cm}^{-1}$ |
| Aromatic C-C               | 1220 $\text{cm}^{-1}$ | CH <sub>2</sub> wagging    | 1350 $\text{cm}^{-1}$ |
| Alkoxy C-O-C               | 1050 $\text{cm}^{-1}$ | CH <sub>2</sub> twisting   | 1258 $\text{cm}^{-1}$ |
| Stretching CH <sub>2</sub> | 2880 $\text{cm}^{-1}$ | Li-O                       | 1300 $\text{cm}^{-1}$ |
| Carbonyl C=O               | 1730 $\text{cm}^{-1}$ | Fe-O                       | 700 $\text{cm}^{-1}$  |
| Fe-O                       | 700 $\text{cm}^{-1}$  |                            |                       |

### Adsorption isotherm

Figure S1 shows that by increasing the concentrations of Pb(II) and Cd(II), the adsorption capacity of EgLiCl-mGO increased.

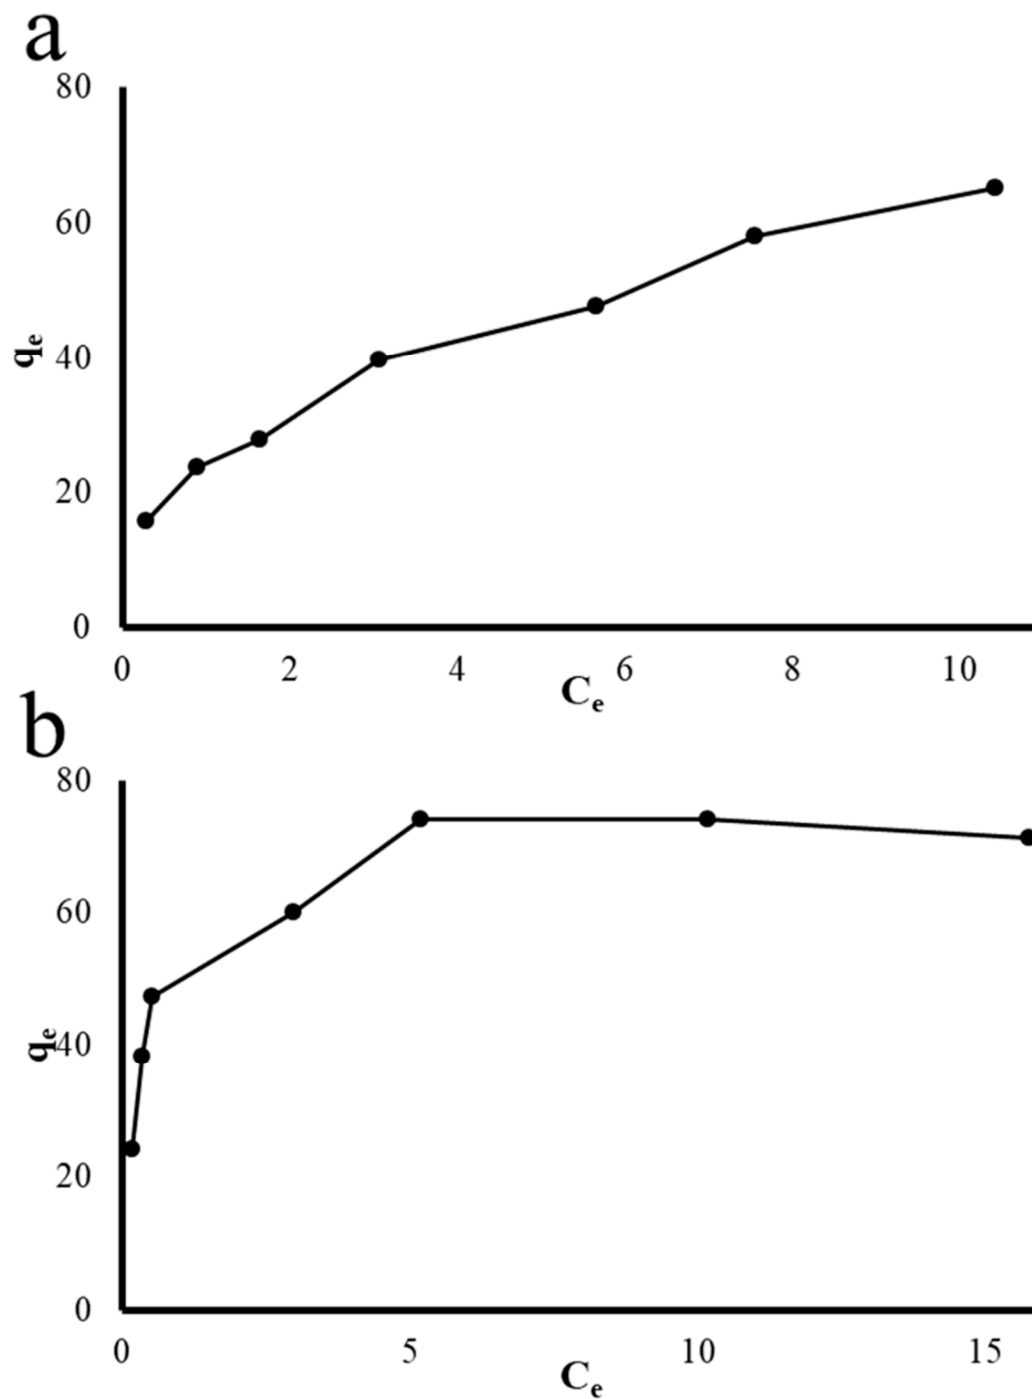

**Figure S1.** Effect of initial concentrations of **a** Pb(II) and **b** Cd(II) on the adsorption capacity of EgLiCl-mGO

Figure S2 shows the Langmuir model of Pb(II) and (b) Cd(II) adsorptions onto EgLiCl-mGO.

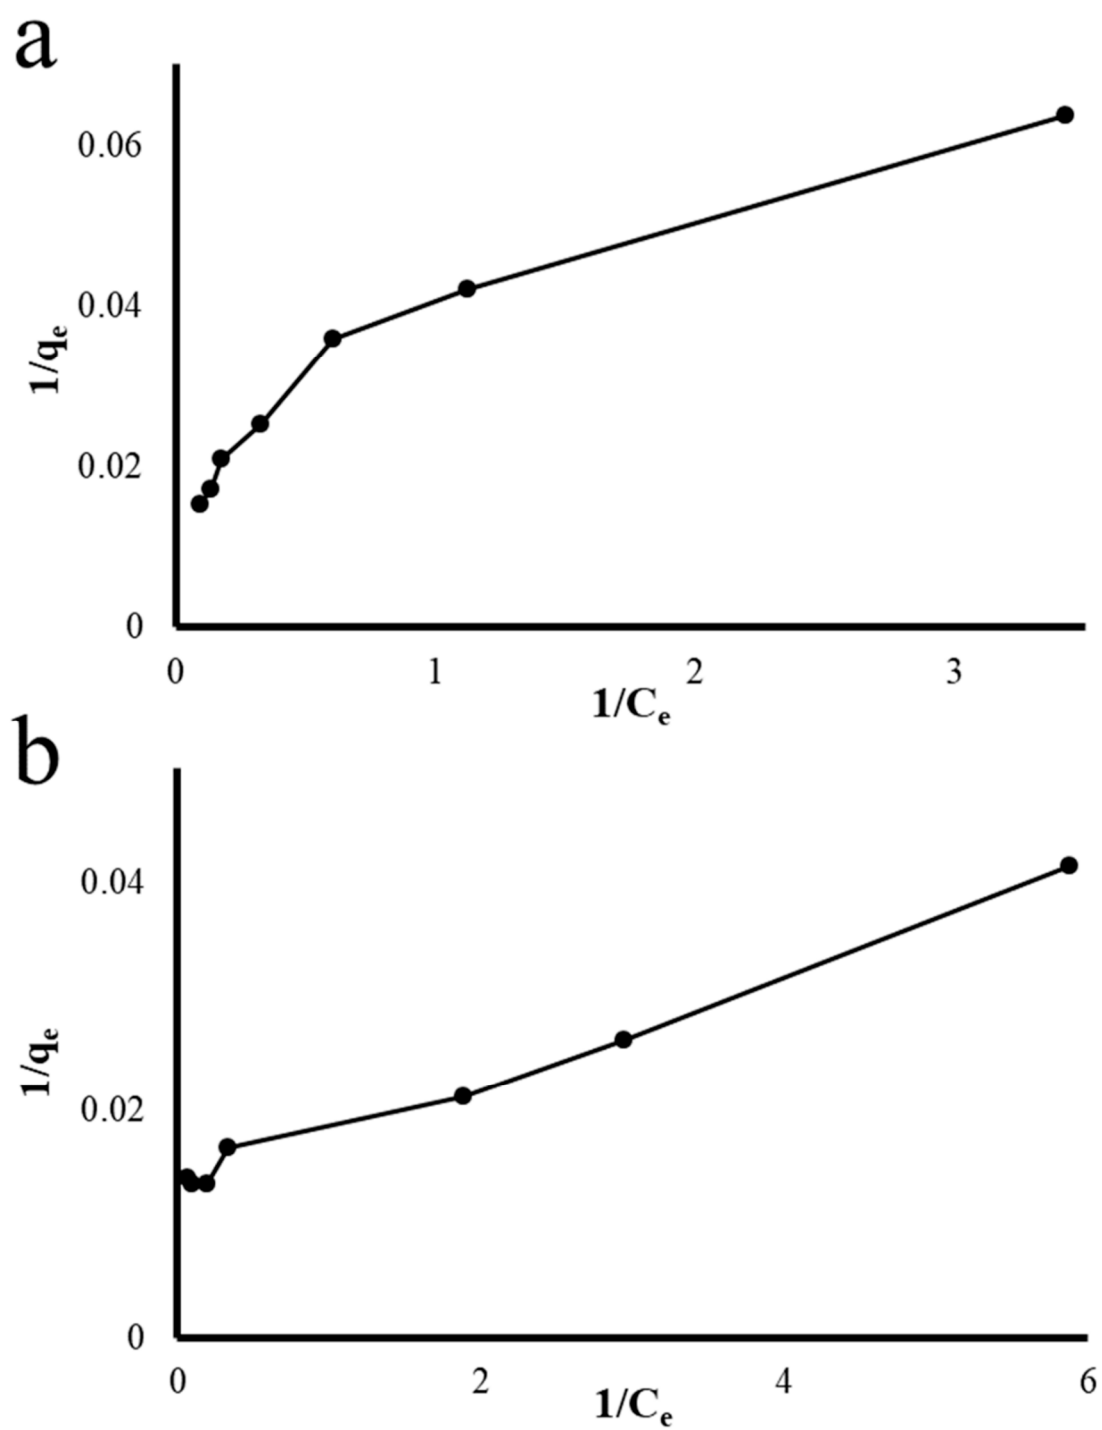

**Figure S2.** The Langmuir model of **a** Pb(II) and **b** Cd(II) adsorptions onto EgLiCl-mGO.

Figure S3 shows the Freundlich model of Pb(II) and (b) Cd(II) adsorptions onto EgLiCl-mGO.

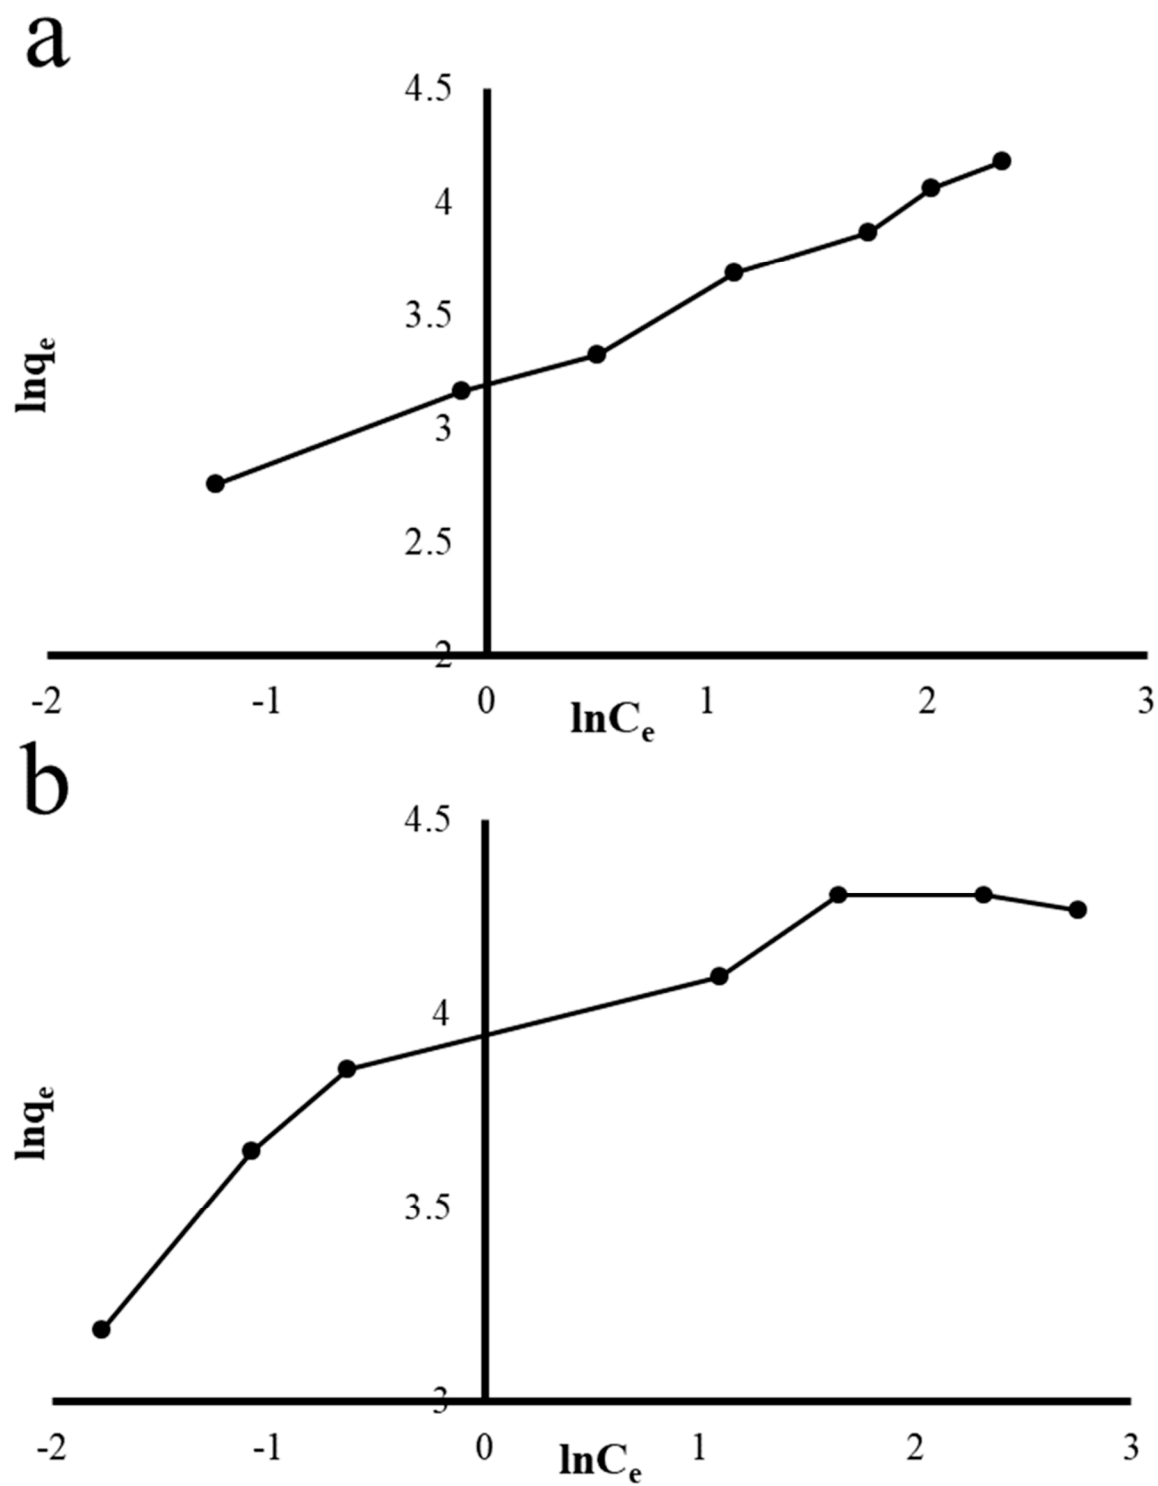

**Figure S3.** The Freundlich model of **a** Pb(II) and **b** Cd(II) adsorptions onto EgLiCl-mGO.

Figure S4 shows the Temkin model of Pb(II) and (b) Cd(II) adsorptions onto EgLiCl-mGO.

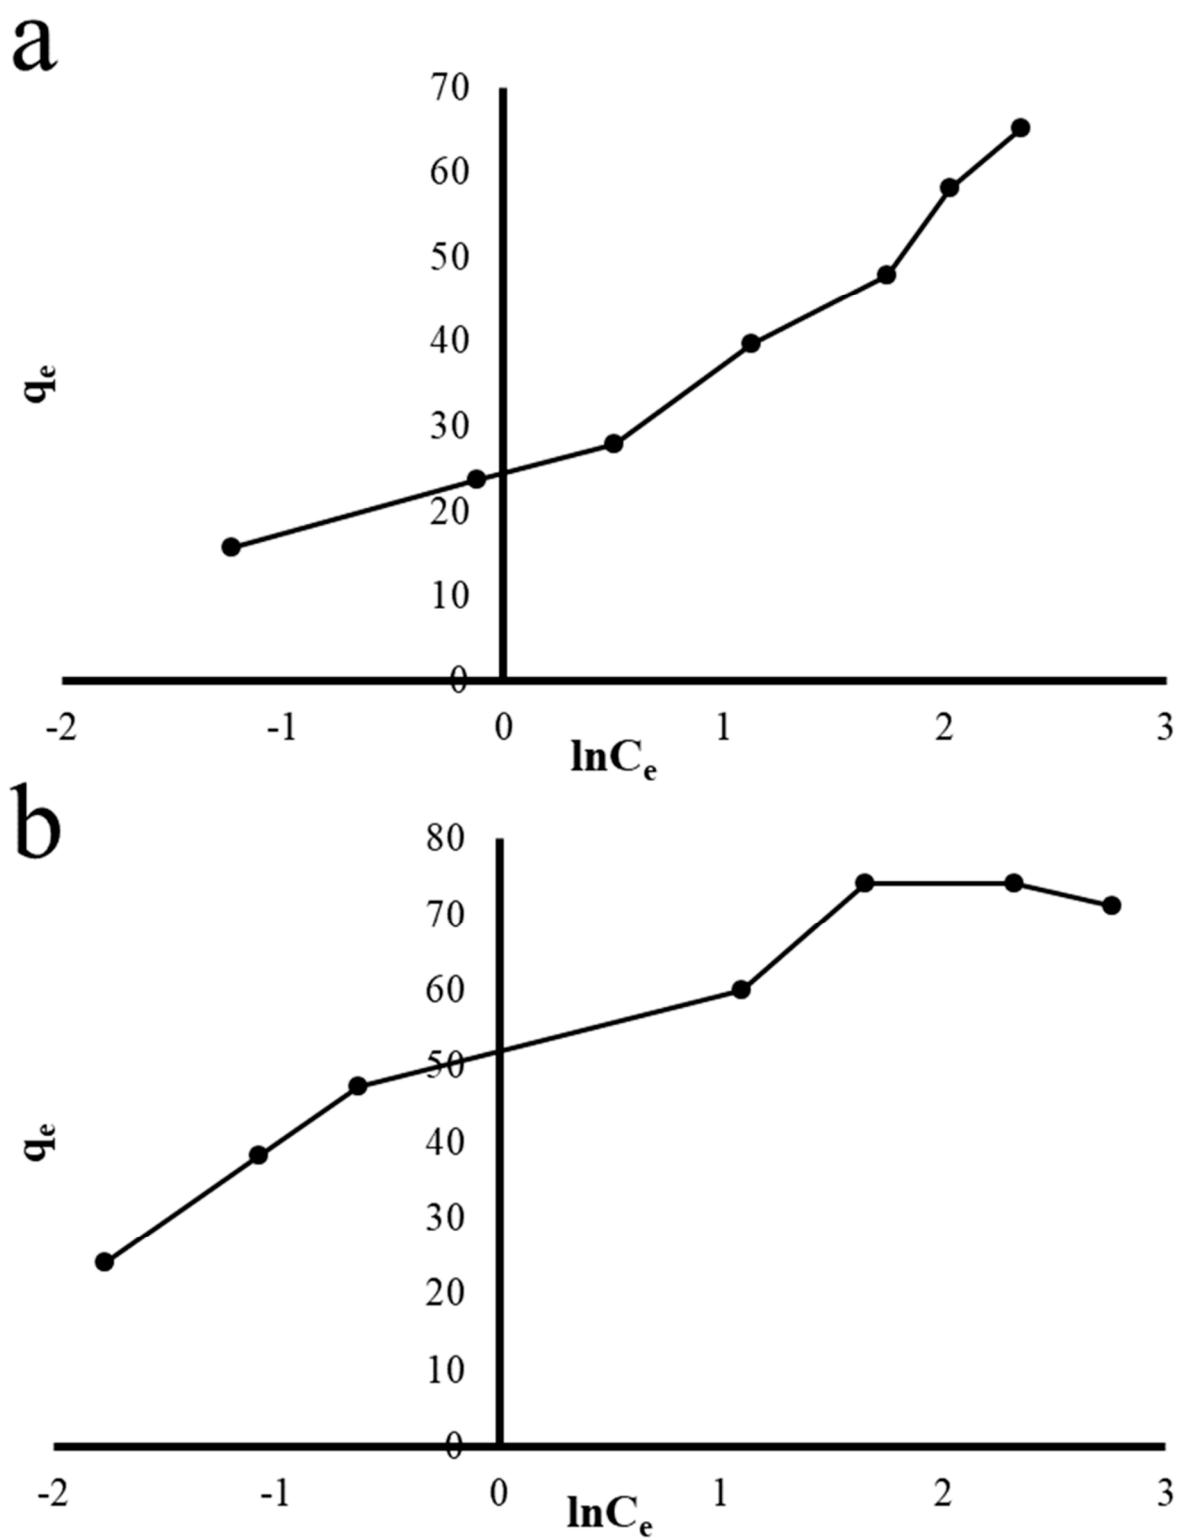

**Figure S4.** The Temkin model of **a** Pb(II) and **b** Cd(II) adsorptions onto EgLiCl-mGO.

Figure S5 shows the Halsey model of Pb(II) and (b) Cd(II) adsorptions onto EgLiCl-mGO.

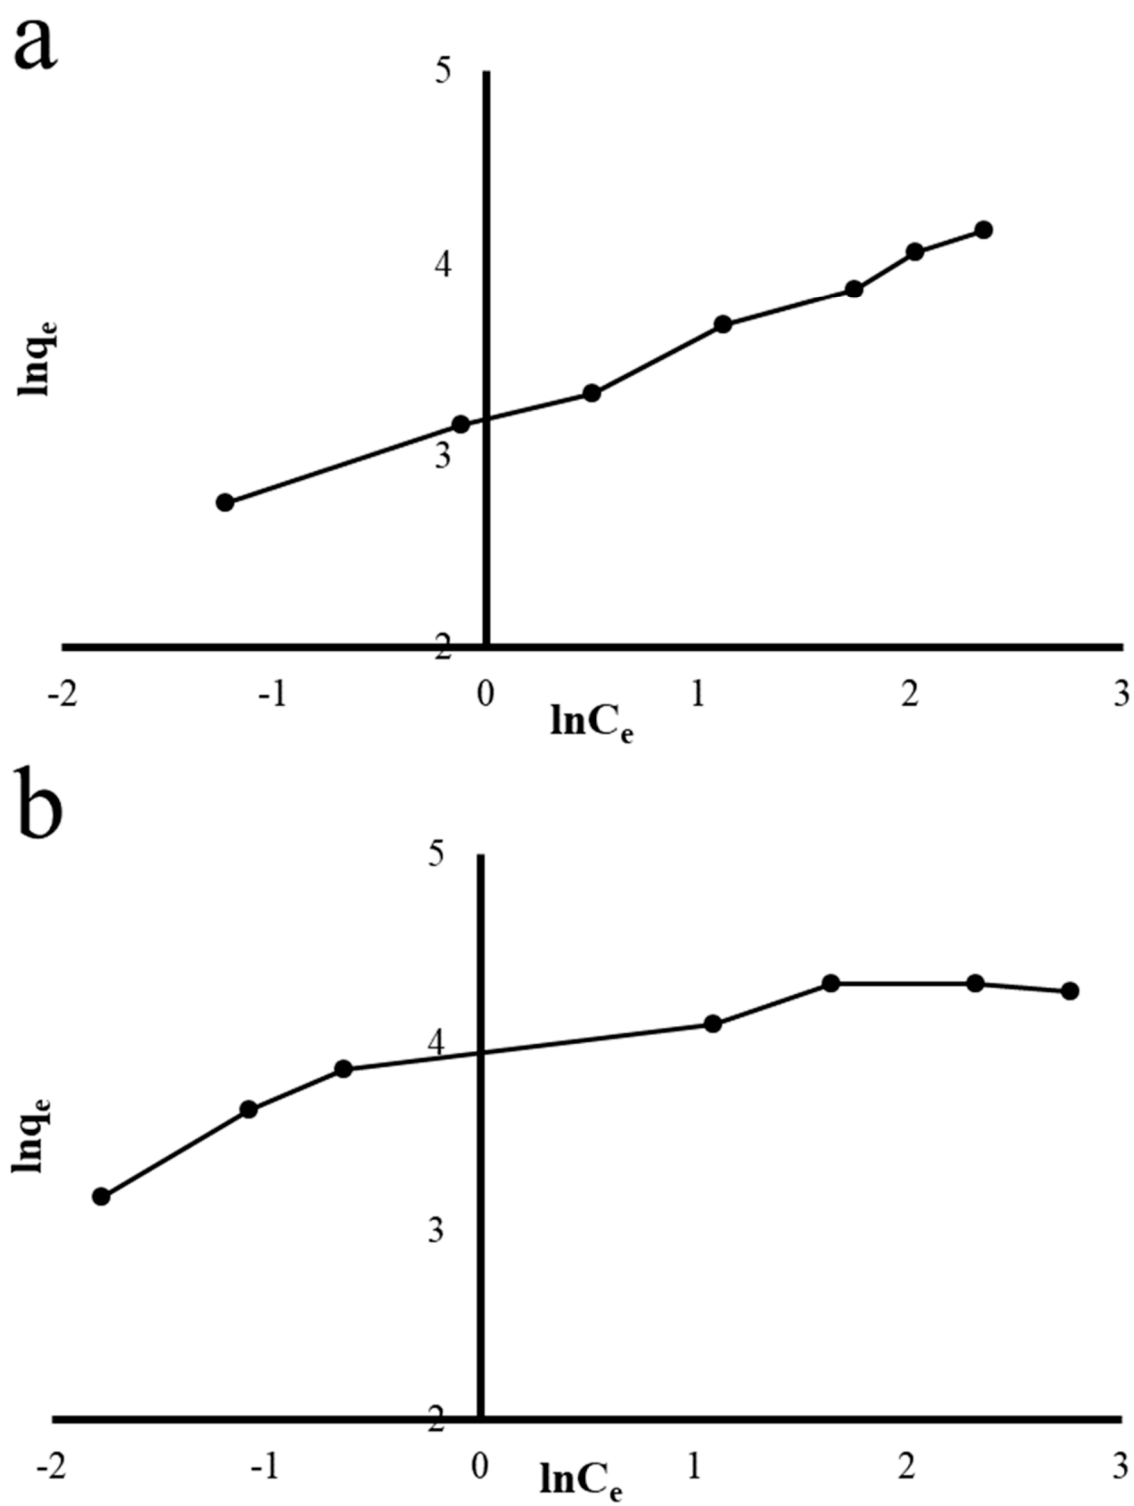

**Figure S5.** The Halsey model of **a** Pb(II) and **b** Cd(II) adsorptions onto EgLiCl-mGO.

Figure S6 shows the Elovich model of Pb(II) and (b) Cd(II) adsorptions onto EgLiCl-mGO.

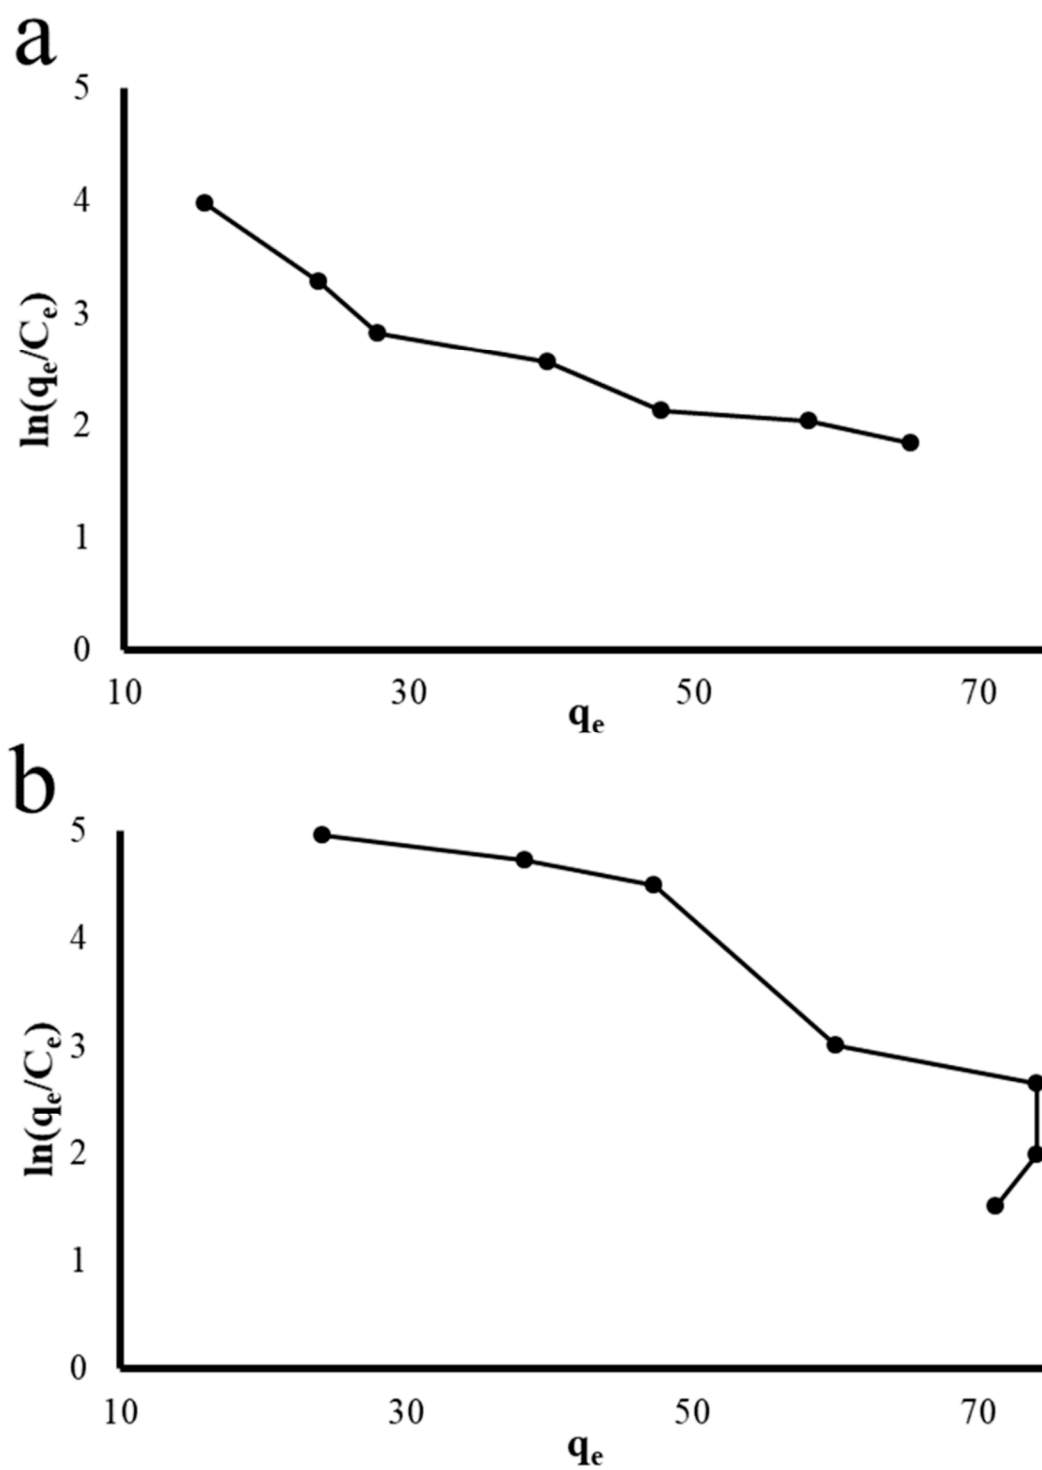

**Figure S6.** The Elovich model of **a** Pb(II) and **b** Cd(II) adsorptions onto EgLiCl-mGO.



## Adsorption kinetic

Figure S7 shows the first-order kinetic model of Pb(II) and (b) Cd(II) adsorptions onto EgLiCl-mGO.

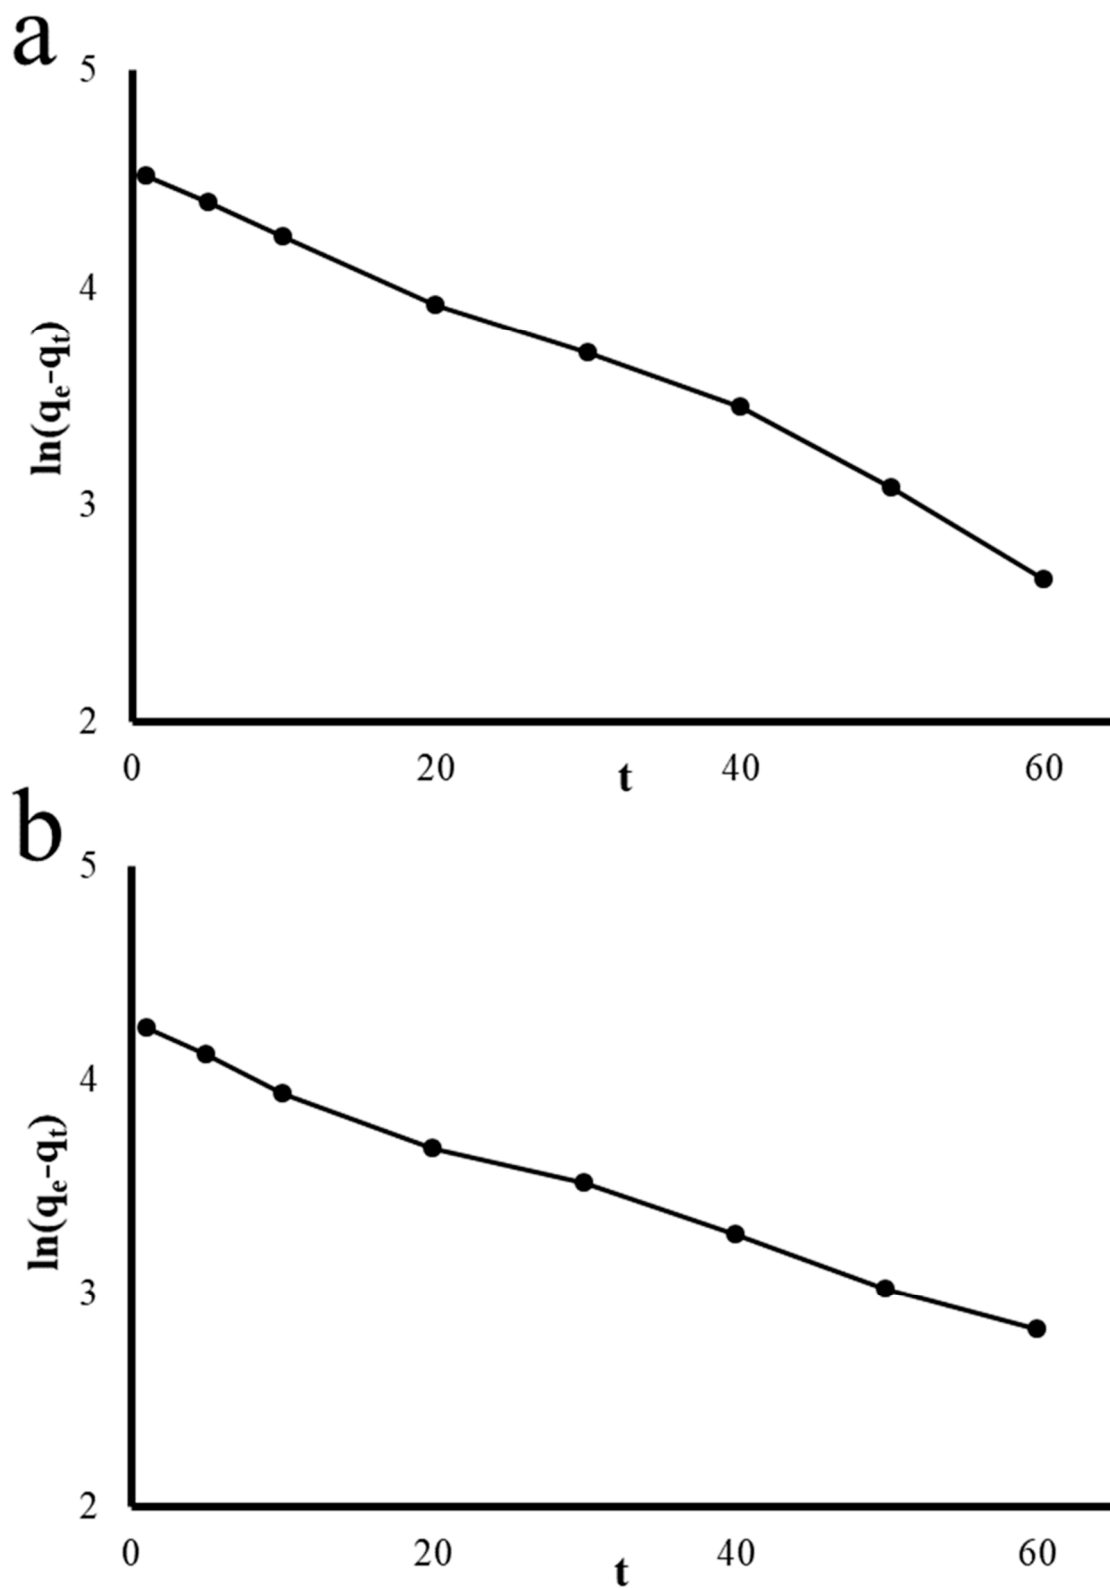

**Figure S7.** The first-order kinetic model of **a** Pb(II) and **b** Cd(II) adsorptions onto EgLiCl-mGO.

Figure S8 shows the second-order kinetic model of Pb(II) and (b) Cd(II) adsorptions onto EgLiCl-mGO.

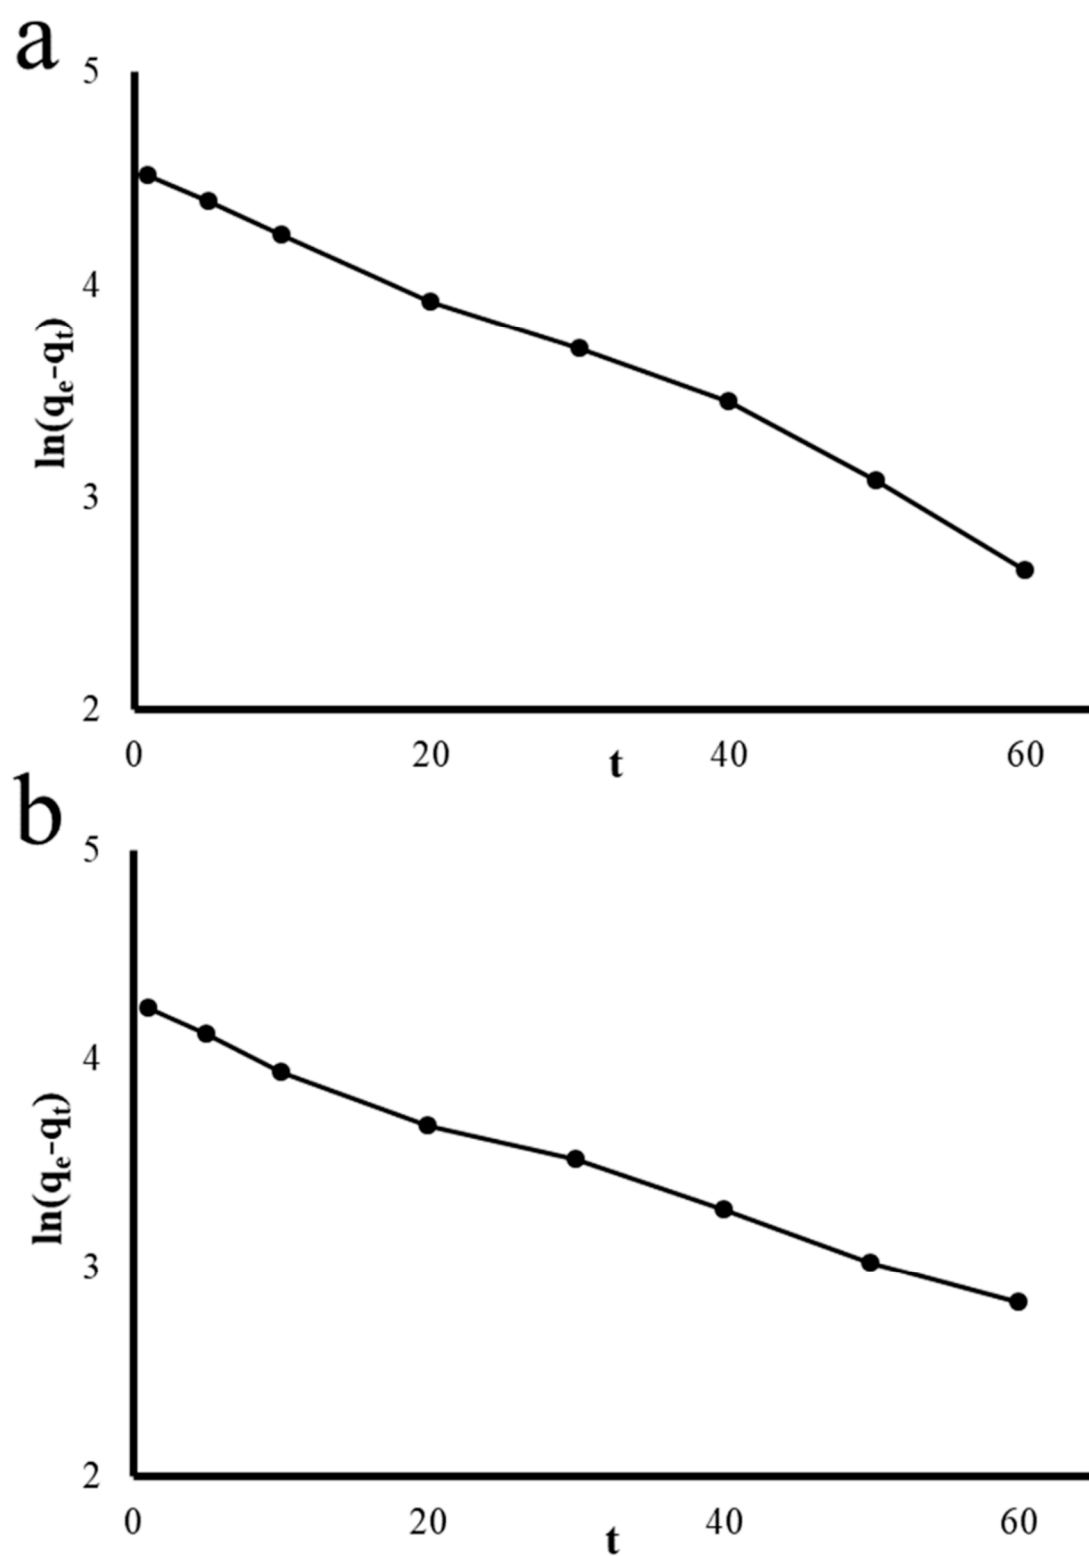

**Figure S8.** The first-order kinetic model of **a** Pb(II) and **b** Cd(II) adsorptions onto EgLiCl-mGO.

### Adsorption thermodynamic

Thermodynamic parameters, enthalpy and entropy for the adsorption of Pb(II) and Cd(I) onto EgLiCl-mGO were calculated according to Figure S9.

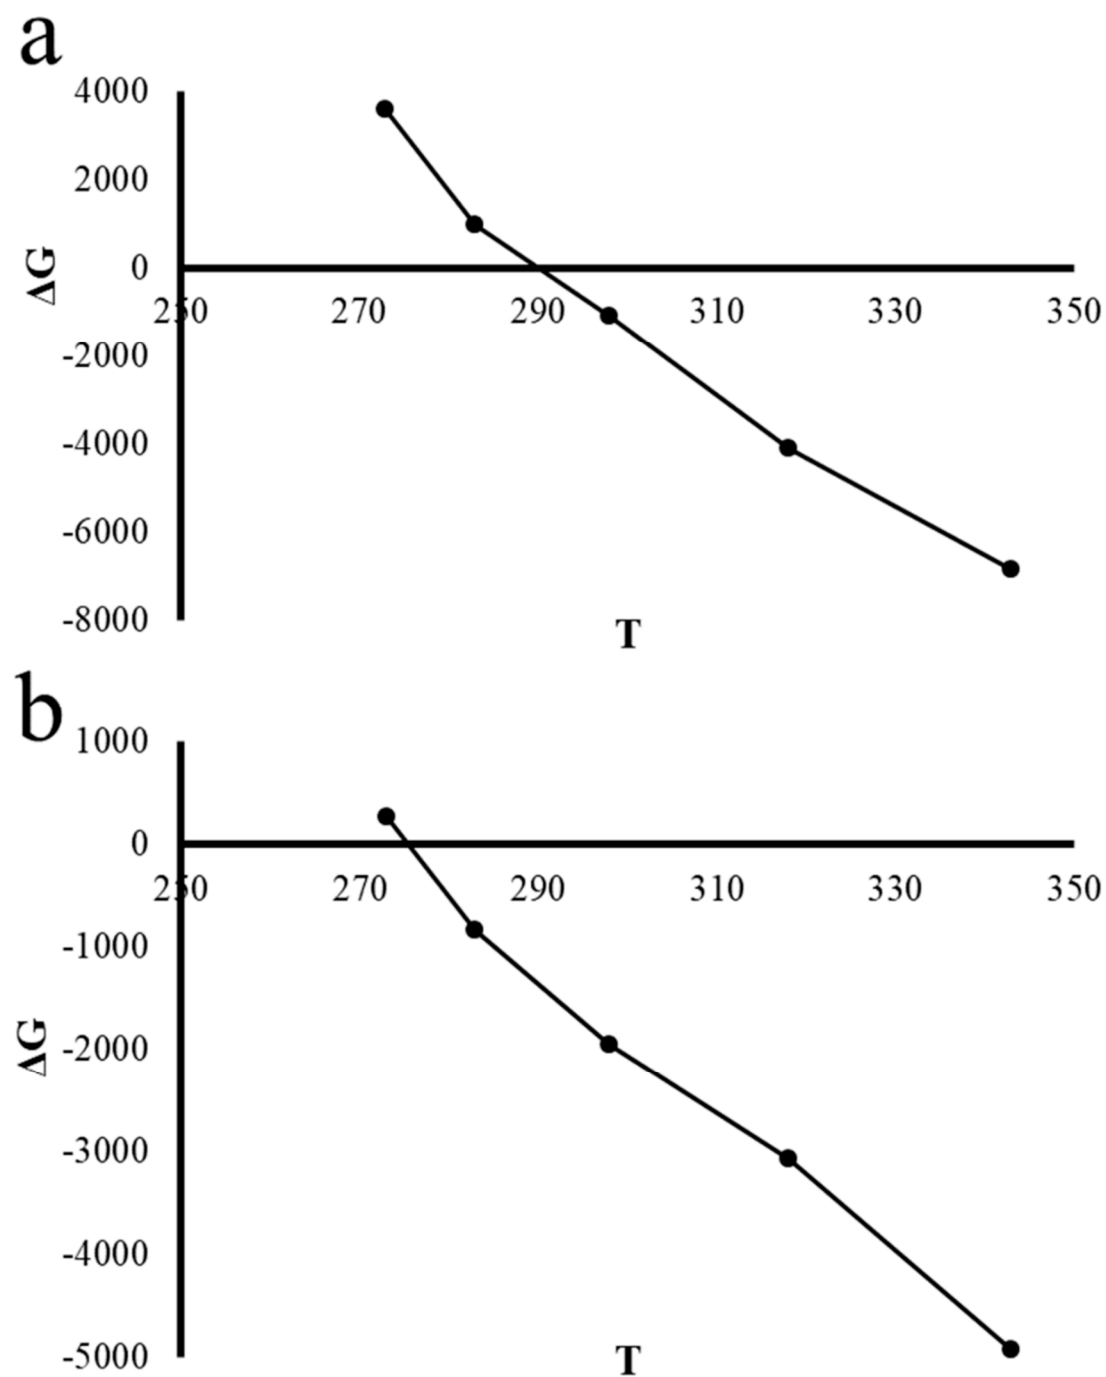

**Figure S9.** Thermodynamic parameters, enthalpy and entropy for the adsorption of **a** Pb(II) and **b** Cd(II) onto EgLiCl-mGO.
